1 **The MarR Family Regulator BmrR is involved in Bile Tolerance of *Bifidobacterium longum***  
2 **BBMN68 via Controlling the Expression of an ABC-Transporter**

3

4 Qi Xu<sup>a</sup>, Zhengyuan Zhai<sup>a,c</sup>, Haoran An<sup>d</sup>, Yang Yang<sup>a</sup>, Jia Yin<sup>a</sup>, Guohong Wang<sup>a</sup>, Fazheng  
5 Ren<sup>a,b</sup>, Yanling Hao<sup>a,b,#</sup>

6 <sup>a</sup>The Innovation Centre of Food Nutrition and Human Health (Beijing), College of Food Science  
7 and Nutritional Engineering, China Agricultural University, Beijing, China

8 <sup>b</sup>Key Laboratory of Functional Dairy, Co-constructed by Ministry of Education and Beijing  
9 Municipality, Beijing, China

10 <sup>c</sup>Department of Food Science & Technology, University of California, Davis, California, USA

11 <sup>d</sup>Center for Infectious Disease Research, Tsinghua-Peking Joint Center for Life Science, School  
12 of Medicine, Tsinghua University, Beijing, China

13

14 **Running Head:** BmrR in bile stress response

15 <sup>#</sup>Address correspondence to Yanling Hao, haoyl@cau.edu.cn

16 **Present address:** College of Food Science and Nutritional Engineering, China Agricultural  
17 University, 17 Qing Hua East Road, Hai Dian District, Beijing, 100083, China

18 Qi Xu and Zhengyuan Zhai contributed equally to this work.

19 **Key words:** *B. longum* BBMN68, bile stress, MarR-type regulator, BmrR, ABC-transporter

## 20 **Abstract**

21 In order to colonize the human gastrointestinal tract and exert their beneficial effects,  
22 bifidobacteria must effectively cope with the toxic bile salts in the intestine, but the molecular  
23 mechanism underlying bile tolerance is poorly understood. In this study, heterologous expression  
24 of a MarR family transcriptional regulator BmrR significantly reduced ox-bile resistance of  
25 *Lactococcus lactis* NZ9000, suggesting that it might play a role in bile stress response. *In silico*  
26 analysis combined with RT-PCR assay demonstrated that *bmrR* was co-transcribed with *bmrA*  
27 and *bmrB*, which encoded multidrug resistance (MDR) ABC transporters. Promoter prediction  
28 and EMSA assay revealed that BmrR could autoregulate the *bmrRAB* operon by binding to *bmr*  
29 box (ATTGTTG-6nt-CAACAAT) in the promoter region. Moreover, heterologous expression of  
30 *bmrA* and *bmrB* in *L. lactis* showed 20.77-fold higher tolerance to 0.10% ox-bile compared to  
31 wild type strain. In addition, ox-bile could disrupt the DNA binding activity of BmrR as a ligand.  
32 Taken together, our findings indicate that *bmrRAB* operon is autoregulated by transcriptional  
33 regulator BmrR and ox-bile serves as an inducer to activate the bile efflux transporter BmrAB in  
34 response to bile stress in *B. longum* BBMN68.

## 35 **Importance**

36 Bifidobacteria are natural inhabitants of the human intestinal tract. Some bifidobacterial strains  
37 are used as probiotics in fermented dairy production because of their health-promoting effects.  
38 Following consumption, bifidobacteria finally colonize the lower intestinal tract where the

39 concentration of bile salts remains nearly 0.05% to 2.0%. Bile salts as detergent-like  
40 antimicrobial compounds can cause disruption of the cellular membrane, protein misfolding and  
41 DNA damage. Therefore, tolerance to physiological bile stress is indeed essential for  
42 bifidobacteria to survive and exert the probiotic effects in gastrointestinal tract. In *B. longum*  
43 BBMN68, the MarR-type regulator BmrR was involved in bile stress response by  
44 auto-regulating *bmrRAB* operon and ox-bile as an inducer could increase the expression of  
45 BmrAB transporter to enhance the bile tolerance of BBMN68. This is the first report about  
46 functional analysis of *bmrRAB* operon in bile stress response, which will provide new insight  
47 into bile tolerance mechanisms in *Bifidobacterium* and other bacteria.

## 48 **Introduction**

49 Bifidobacteria are natural inhabitants of the human gastrointestinal tract (GIT), constituting up to  
50 approximately 91% of the total gut microbiome during early stages of life (1). Some  
51 bifidobacteria are considered as probiotics, and used as active ingredients in functional  
52 dairy-based products (2). The health benefits are exerted mainly through inhibiting pathogens,  
53 preventing diarrhoea, stimulating the immune response and reducing serum cholesterol levels  
54 (3). Upon ingestion, bifidobacteria inevitably have to cope with several stress conditions, such as  
55 the low pH in the stomach and bile salts in the intestine (4, 5). As detergent-like biological  
56 substances with strong antimicrobial activities, bile salts can disrupt the lipid bilayer structure of  
57 cellular membranes, induce protein misfolding and cause DNA damage (6). Bifidobacteria have

58 been reported to develop tolerance response to bile stress, but the comprehensive mechanism of  
59 bile resistance remains elusive.

60 Among the bile resistance mechanisms employed by bifidobacteria, bile salt hydrolysis (BSH)  
61 and bile efflux transporter are well documented. Bile salt hydrolases (BSHs) are responsible for  
62 deconjugation of glycine- or taurine-conjugated bile salts, therefore decreasing the toxicity of  
63 conjugated bile salts (7). The bile efflux system is mediated by a multidrug resistance (MDR)  
64 transporter located on the cell membrane, such as Ctr of *B. longum* NCIMB 702259<sup>T</sup> (8), BetA in  
65 *B. longum* NCC2705 (9) and BbmAB in *B. breve* UCC2003 (10). Several studies have shown  
66 that bifidobacteria modulated the cell envelope including fatty acid composition and membrane  
67 proteins to decrease membrane permeability in response to bile salts (11, 12). In addition, a  
68 hemolysin-like protein TlyC1 functions as a barrier to protect the strain from bile toxicity and  
69 provides resistance to sodium taurocholate and sodium taurodeoxycholate in *B. longum*  
70 BBMN68 (13). Two-component system *senX3-regX3* was reported to promote the expression of  
71 the *pstS* gene to maintain a high-level of P<sub>i</sub> uptake and produce more ATP to resist bile stress in  
72 *B. longum* BBMN68 (14).

73 *B. longum* BBMN68 was isolated from healthy centenarians in Bama longevity villages of  
74 Guangxi province in China, which may enhance innate and adaptive immunity, alleviate allergic  
75 response and improve intestinal function in mice (15, 16). In our study, RNA-Seq transcriptomic  
76 analysis showed that the BBMN68\_1796 gene encoding MarR-type transcriptional regulator was

77 1.85-fold up-regulated under bile stress in BBMN68 (unpublished). It has been reported that the  
78 MarR family transcriptional regulators are involved in the regulation in response to diverse  
79 environmental signals, such as synthesis of virulence factors and antibiotic stress (17, 18). Martin  
80 *et al.* found that transcription of multiple antibiotic resistance (*marORAB*) operons was  
81 repressed by the MarR protein (19). Furthermore, another MarR type repressor EmrR has been  
82 reported to control the EmrAB efflux transporter in *E. coli* (20). In the present work, we  
83 investigated the regulatory mechanism of protein BBMN68\_1796 designated as BmrR  
84 (*Bifidobacterium* multidrug resistance regulator) in ox-bile stress response in *B. longum*  
85 BBMN68. The data suggests that BmrR autorepresses the transcription of *bmrR* operon and  
86 ox-bile serves as ligand of BmrR to attenuate this binding to enhance the expression of efflux  
87 transporter genes to export ox-bile in *B. longum* BBMN68.

## 88 **Results**

### 89 **Heterologous expression of *bmrR* in *L. lactis* NZ9000 increases its sensitivity to bile stress**

90 DNA sequencing showed that the length of the amplified gene *bmrR* was 534 bp, which was  
91 100% homologous to the *bmrR* gene from *B. longum* BBMN68 (BBMN68\_1796; GenBank  
92 Accession No. NC\_014656.1). SDS-PAGE analysis revealed that the production of an expected  
93 20 kDa protein in *L. lactis* BmrR after nisin induction (Figure 1A, lane 4), indicating the  
94 successful expression of *bmrR* in *L. lactis* NZ9000. Then, the recombinant strains were incubated  
95 with 0.10% wt/vol ox-bile for 1 h, and the survival of *L. lactis* BmrR was 57-fold lower than that

96 of *L. lactis* NZCK ( $P < 0.0001$ , Figure 1B). These results showed that the heterologous expression  
97 of *bmrR* in *L. lactis* NZ9000 significantly reduced its resistance to ox-bile, indicating that BmrR  
98 played a critical role in bile stress response.

### 99 **Bioinformatics analysis revealed that BmrR was a MarR family regulator**

100 In *B. longum* BBMN68, BmrR is annotated as a putative MarR family regulator. Although the  
101 amino acid sequence similarity between MarR family members was usually less than 25% as  
102 described previously (21), secondary structure prediction of BmrR revealed a high structural  
103 homology with the MarR family members used in the alignment (Figure 2). The core of the  
104 domain consists of three  $\alpha$ -helices ( $\alpha 1$ ,  $\alpha 2$  and  $\alpha 3$ ) and two antiparallel beta sheets ( $\beta 2$  and  $\beta 3$ ),  
105 which is stabilized in part by a short beta strand ( $\beta 1$ ), creating a three-stranded beta sheet (17,  
106 22). These MarR proteins have been described as winged helix proteins that bind directly to the  
107 DNA to control a wide range of biological processes in both bacteria and archaea (23, 24). The  
108 region spanning amino acids 61–121 in MarR are required for its DNA binding activity (25). The  
109 DNA binding motif is composed of  $\beta 1$ – $\alpha 3$ – $\alpha 4$ – $\beta 2$ – $\beta 3$ , which adopts the winged-helix fold.  
110 Helices  $\alpha 1$ ,  $\alpha 5$  and  $\alpha 6$  are involved in dimerization (23, 26), which indicates that they could bind  
111 to the promoter region of their target genes as dimers leading to either transcriptional repression  
112 and/or activation (17).

### 113 ***In silico* analysis of the *bmrR* gene and determination of *bmrRAB* operon**

114 We noticed that the start codon of *bmrR*, *bmrA* and *bmrB* genes were overlapped with the stop  
115 codon of the proceeding gene. A putative promoter sequence was found 64 bp upstream of the  
116 potential *bmrR* start codon by the online promoter prediction tools NNPP and BPROM (27, 28),  
117 but no other promoter was predicted upstream the *bmrA* or *bmrB* gene. The first gene *bmrR*  
118 possessed a putative ribosome-binding site 8 bp (TGGTAC) upstream of its start codon, while  
119 the third gene *bmrB* was followed by a transcription terminator-like sequence (Figure 2A). Based  
120 on these observations, we hypothesized that these three genes were co-transcribed in the same  
121 cluster. RT-PCR assay with cDNA as template further confirmed that genes from *bmrR* to *bmrB*  
122 formed a polycistronic operon, designated as *bmrRAB* (Figure 3B). MarR family regulators were  
123 reported to bind recognizable palindromic sequences within the promoter region upstream the  
124 target genes (29). Bioinformatics analysis revealed that an IR sequence  
125 (ATTGTTG-6nt-CAACAAT) was also found within the *bmrRAB* promoter in BBMN68.

### 126 **Identification of the DNA-binding specificity of BmrR by EMSA**

127 In order to further confirm DNA-binding specificity of BmrR with its promoter, a 69 bp DNA  
128 probe was synthesized and labeled by biotin at 3'end for EMSA. The BmrR with a C-terminal  
129 His tag was expressed in *L. lactis* NZ9000 and purified by affinity chromatography. SDS-PAGE  
130 revealed a single protein band with a molecular mass of approximate 20 kDa, indicating that the  
131 recombinant BmrRHis was successfully expressed and purified for subsequent EMSAs (Figure  
132 4A, lane 4). The EMSA results indicated that the purified BmrRHis bounded to biotin-labeled

133 *bmrR* probe and retarded its mobility (Figure 4C, lane 2). Moreover, the quantity of  
134 DNA-protein binding bands was enhanced with an increasing concentration of BmrR (Figure 4C,  
135 lane 2 to lane 4). BmrRHis could not bound to either mutated probe up<sup>-</sup> or probe down<sup>-</sup> (Figure  
136 4D), indicating the palindromic sequence (ATTGTTG-6nt-CAACAAT), designated as *bmr* box  
137 in *bmrRAB* promoter region was essential for BmrR binding. These findings indicated that BmrR  
138 could specifically bind to *bmr* box upstream the *bmrRAB* operon.

### 139 **Heterodimer ABC-transporter BmrAB was involved in ox-bile tolerance**

140 In order to determine whether the ABC-transporter BmrAB was involved in the ox-bile  
141 resistance, *bmrA*, *bmrB* and *bmrAB* were amplified and cloned into pNZ8147 vector. The  
142 recombinant plasmids were verified by DNA sequencing and then transformed into heterologous  
143 host *L. lactis* NZ9000, resulting in *L. lactis* BmrA, *L. lactis* BmrB and *L. lactis* BmrAB,  
144 respectively. Survival assay showed that there was no significant difference between the  
145 recombinant strain *L. lactis* BmrA and control strain *L. lactis* NZCK under bile stress ( $P>0.05$ ,  
146 Figure 5), but the survival rate of *L. lactis* BmrB was 16-fold lower than that of *L. lactis* NZCK  
147 in presence of 0.10% wt/vol ox-bile. It is noteworthy that the survival rate of BmrA and BmrB  
148 co-expressed strain *L. lactis* BmrAB was significantly increased, which was 20.77-fold higher  
149 than that of the control in GM17 supplemented with 0.10% wt/vol ox-bile ( $P<0.05$ , Figure 5).  
150 These results indicated that BmrA and BmrB together can enhance the bile resistance of host  
151 strain probably by forming a heterodimer ABC-transporter to pump out the intracellular bile.



152 **BmrR dissociates from DNA in the presence of ox-bile**

153 The DNA binding activity of some transcriptional regulators from MarR family was reported to  
154 be affected by specific ligands, which dissociate the regulator from DNA with a consequent  
155 modulation of gene expression (30). In our study, the mRNA level of *bmrR* was upregulated  
156 1.85-fold under ox-bile stress in BBMN68 (unpublished). Therefore, we hypothesized that  
157 ox-bile might be a ligand of BmrR and affect the interaction between BmrR and its binding site.  
158 To verify this hypothesis, different concentrations of ox-bile were applied to EMSA reactions.  
159 The addition of 0.15% wt/vol ox-bile led to complete dissociation of BmrR from its target DNA  
160 (Figure 6, Lane 5). These results indicated that ox-bile was an effector for BmrR and could  
161 disrupt the DNA binding activity of BmrR in BBMN68.

162 **Discussion**

163 In bacteria, multiple antibiotic resistance regulator (MarR) family proteins constitute a diverse  
164 group of transcriptional regulators that modulate the expression of genes encoding proteins  
165 involved in metabolic pathways, stress responses, virulence and degradation or efflux of harmful  
166 chemicals (22). Some MarR family transcription factors involved in bile stress response have  
167 been identified in multiple bacterial species, including *Salmonella Typhimurium*, *L. lactis* and  
168 *Enterococcus faecalis* (31-33). In *Salmonella Typhimurium*, *marRAB* was activated in the  
169 presence of bile and the *marRAB* mutant showed more sensitive to bile stress than the wild-type  
170 strain (31). SlyA is a MarR family transcriptional regulator identified in *Enterococcus faecalis*

171 and the growth of *slyA* mutant strain was significantly impaired in the presence of bile salts (33).  
172 In this study, heterologous expression of *bmrR* gene in *L. lactis* NZ9000 decreased the bile  
173 tolerance of host strain, suggesting that it might play a role in bile stress response. The *bmrR*  
174 gene was co-transcribed with *bmrA* and *bmrB*, which encoded the multidrug resistance (MDR)  
175 ABC transporters. This ABC transporter BmrAB was observed to enhance the bile tolerance of  
176 host strain, when *bmrAB* gene was expressed in *L. lactis* NZ9000. Therefore, we supposed that  
177 the *bmrRAB* operon in bifidobacteria played a critical role in enhancing the resistance to bile  
178 stress.  
179 The *bmrA* and *bmrB* gene were predicted to encode 652 and 671 amino acid protein as putative  
180 ABC transporters by a database enquiry (BLASTP). The hydrophobic profile analysis  
181 demonstrated that both proteins possessed a transmembrane domain with six putative helices,  
182 followed by cytoplasmically localized NBD domain with a putative ATP-binding domain and the  
183 ABC signature sequence (34, 35). The ATP-hydrolyzing domains are characterized by two short  
184 sequence motifs in their primary structure ('Walker' site A and 'Walker' site B) that constitute a  
185 nucleotide binding fold (Figure S1). These analyses suggested that BmrA and BmrB might also  
186 serve as ABC half-transporter. The ABC transporter utilized the free energy of ATP hydrolysis  
187 to drive substrate transport across lipid bilayer. It has been proved that several prokaryotic ABC  
188 transporters act as dimers. Homodimeric ABC transporters have been experimentally identified,  
189 such as LmrA in *L. lactis* (36) and MsbA in *E. coli* (37). Meanwhile, heterodimeric ABC

190 transporters are also found in some species, such as LmrCD in *L. lactis* (38) and BbmAB in *B.*  
191 *breve* UCC2003 (10). BbmA and BbmB were further reported to be induced by  $3.21 \pm 1.3$  fold  
192 and  $5.00 \pm 0.9$  fold in the presence of bile salts, respectively (9). In agreement with these MDR  
193 transporters, BmrA and BmrB were found to be 2.33 fold and 2.09 fold up-regulated by ox-bile  
194 in *B. longum* BBMN68 (unpublished). In this study, the co-expression of BmrA and BmrB can  
195 enhance the bile resistance of host strain, suggesting that BmrA and BmrB formed a heterodimer  
196 ABC-transporter to pump out the intracellular bile in *B. longum* BBMN68.  
197 In the present study, we observed that the MarR family regulator BmrR could interact with the  
198 promoter region of *bmrRAB* operon to regulate the transcription of these three genes. In addition,  
199 the 3D structure of BmrR was generated using SWISS MODEL server  
200 (<http://www.expasy.ch/swissmod/SWISS-MODEL.html>), indicating BmrR is able to form a  
201 homodimer like other MarR proteins (Figure S2). Generally, MarR family regulators were  
202 reported to bind recognizable palindromic sequences within the promoter region, resulting in  
203 attenuation of gene expression by sterically hindering the binding of RNA polymerase to the  
204 promoter. In addition, the MarR family transcription factors can also respond to a variety of  
205 effector molecules (17, 22). When the ligand binds to MarR family transcription factor, DNA  
206 binding is attenuated, resulting in de-repression of transcription (17). In this study, we observed  
207 that the formation of BmrR-DNA complex was impaired in the presence of ox-bile (Figure 6).  
208 Based on these results, we proposed a bile sensing and adaptive regulation model of *bmrRAB*

209 operon in *B. longum* (Figure 7). Under the normal growth condition, BmrR binds to *bmr* box in  
210 the *bmrRAB* promoter region and prevents transcription of *bmrRAB* operon. When ox-bile enters  
211 the cell, BmrR interacts with ox-bile and then causes significant conformational change in the  
212 DNA-binding domains, resulting in release of the BmrR repressor from *bmrRAB* promoter. This  
213 modification will lead to the transcription of BmrAB ABC-transporters. Newly synthesized  
214 BmrAB will be embedded in the membrane and mediate the efflux of the ox-bile from the cell.  
215 To our knowledge, this is the first report about functional analysis of *bmrRAB* operon in bile  
216 stress response, which is of great importance for exploring novel bile tolerance mechanisms in  
217 *Bifidobacterium* and other bacteria.

## 218 **Material and methods**

### 219 **Bacterial strains and growth conditions**

220 The bacterial strains and plasmids used in this study are listed in Table S1. *B. longum* BBMN68  
221 was grown in de Man-Rogosa-Sharpe (MRS) broth supplemented with 0.05% (vol/vol)  
222 L-cysteine (MRSc) at 37°C anaerobically (5% CO<sub>2</sub>, 5% H<sub>2</sub> and 90% N<sub>2</sub>). *Lactococcus lactis*  
223 NZ9000 was routinely grown at 30°C in M17 medium (Oxoid, Unipath, Basingstoke, UK)  
224 containing 0.5% wt/vol glucose (GM17). When necessary, medium was supplemented with 10  
225 µg · ml<sup>-1</sup> chloramphenicol for *L. lactis*.

### 226 **Construction of the recombinant strain *L. lactis* BmrR**

227 Standard PCR was carried out using Q5<sup>TM</sup> High-Fidelity DNA polymerase following the  
228 manufacturer's instructions (NEB, Beijing, China). The *bmrR* was amplified from genomic DNA  
229 of *B. longum* BBMN68 using the primer pair: *bmrR*-F and *bmrR*-R (Table S2). The PCR product  
230 digested by *NcoI* and *XbaI* was inserted into the corresponding sites of pNZ8148. Subsequently,  
231 the ligation mixture was transformed into *L. lactis* NZ9000 according to previously described  
232 procedures (39). The recombinant plasmid pNZBmrR was verified by DNA sequencing and  
233 further analyzed with the DNAMAN software package (Lynnon Biosoftware, Vaudreuil, Quebec,  
234 Canada). The strain harboring pNZBmrR was designated *L. lactis* BmrR. Meanwhile, a control  
235 strain (*L. lactis* NZCK) was constructed by introducing the empty vector pNZ8148 into *L. lactis*  
236 NZ9000. Sodium dodecyl sulphate-polyacrylamide gel electrophoresis (SDS-PAGE) analysis  
237 was used to investigate the expression of *bmrR* in *L. lactis*.

### 238 **Bile stress survival experiment**

239 Overnight cultures of recombinant strains were inoculated into 10 ml of fresh GM17  
240 supplemented with 10  $\mu\text{g} \cdot \text{ml}^{-1}$  chloramphenicol (1% inoculums). When cell density reached an  
241  $\text{OD}_{600}$  of 0.3, nisin was added (final concentration 10  $\text{ng} \cdot \mu\text{l}^{-1}$ ) and further incubated for 2 h at  
242 30°C. Aliquots of 1 mL of culture were collected and suspended in 1ml fresh GM17 medium  
243 containing 0.10% wt/vol ox-bile (Sigma, St. Louis, MO, USA). After incubation at 30°C for 1 h,  
244 the number of colony-forming units per milliliter ( $\text{CFU} \cdot \text{ml}^{-1}$ ) was determined by plating 10-fold  
245 serial dilutions on GM17 plates containing 10  $\mu\text{g} \cdot \mu\text{l}^{-1}$  chloramphenicol and incubating at 30°C

246 for 16 h. Survival rate were calculated by dividing the number of colony-forming units (CFU)  
247 per ml after ox-bile incubation by the value obtained immediately after resuspension. All results  
248 were obtained by at least three independent experiments with each performed in triplicate.

#### 249 **Purification of recombinant BmrR and electrophoretic mobility shift assay (EMSA)**

250 The gene *bmrR* was amplified by PCR using the primer pair *bmrRHis-F* and *bmrRHis-R* listed in  
251 Table S2, which introduced a six histidine tag at the C-terminal end of this protein, immediately  
252 prior to the stop codon to simplify protein purification by affinity chromatography using a nickel  
253 column. The PCR product digested by *NcoI/XbaI* was ligated with pNZ8148 at the  
254 corresponding restriction sites, resulting in recombinant plasmid pBmrRHis. This plasmid was  
255 then introduced into *L. lactis* NZ9000, and the transformant harboring the correct construct was  
256 designated *L. lactis* BmrRHis. The protein BmrR with a C-terminal His tag (designated  
257 BmrRHis) was purified with Ni Sepharose 6 Fast Flow media (GE Healthcare, Uppsala, Sweden)  
258 according to the manufacturer's recommendations. Subsequently, purified BmrRHis was  
259 concentrated by ultrafiltration (Millipore, 10 kDa cut off; Bedford, MA, USA) and centrifugation  
260 at  $13,000 \times g$  for 30 min at 4°C. The purified BmrRHis was analyzed by SDS-PAGE and protein  
261 concentration was estimated using NanoDrop 2000 UV-Vis Spectrophotometer (Thermo  
262 Scientific, Wilmington, DE, USA). Purified protein was used immediately or stored at -80°C for  
263 subsequent experiments.

264 EMSA was performed using the LightShift<sup>®</sup> Chemiluminescent EMSA Kit (Thermo Scientific,

265 Rockford, IL, USA). To obtain biotin 3' end-labelled probes, two complementary  
266 oligonucleotides listed in Table S2 were synthesized and annealed at 95°C for 5 min, with the  
267 temperature decreasing by 1°C per minute and thereafter until holding 4°C. EMSA were  
268 performed according to the manufacturer's instructions, and the binding reactions (20 µl)  
269 contained 1×binding buffer, 50 ng · µl<sup>-1</sup> Poly dI-dC, 2.5% (vol/vol) glycerol, 0.05% (vol/vol)  
270 NP-40, 20 fmol labeled probe, 5 mM MgCl<sub>2</sub>, and 0.01 ng · µl<sup>-1</sup> BmrRHis, for 20 min at room  
271 temperature. To determine if the inverted repeat (IR) structure of predicted binding site was  
272 essential, conserved binding site IR1 (ATTGTTG) was changed to GCCACGA, and IR2  
273 (CAACAAT) was changed to GCCACGA, as shown in Figure 4B. In addition, different  
274 concentrations of BmrRHis (0.01 µg · µl<sup>-1</sup>, 0.02µg · µl<sup>-1</sup> and 0.03µg · µl<sup>-1</sup>) and ox-bile (0.05%,  
275 0.10% and 0.15% wt/vol) were applied to determine the dose effects on the binding activity of  
276 BmrR. The subsequent steps were carried out following the manufacturer's instructions.  
277 Chemiluminescent signals of biotinylated probes were captured using a CCD camera imaging  
278 system (UVP, Upland, CA, USA).

### 279 **Validation of *bmrR* operon by Reverse-transcription PCR**

280 *B. longum* BBMN68 cells were immediately harvested at an OD<sub>600</sub> of 0.6 by centrifugation at  
281 6000 × *g* for 10 min. Total RNA was isolated using Trizol Reagent (Invitrogen, Carlsbad, CA,  
282 USA) according to the manufacturer's instructions, and digested with RNase-free DNase I  
283 (Tiangen, Beijing, China). RNA concentrations were quantified using the NanoDrop 2000

284 (Thermo Scientific). RNA quality was assessed with the 2100 Bioanalyzer (Agilent  
285 Technologies, Amstelveen, Netherlands). Subsequently, reverse transcription was carried out  
286 with PrimeScript II 1st strand cDNA synthesis kit (Takara, Beijing, China), with 1 µg of total  
287 RNA as the template. Specific primers listed in Table S2 were designed using PRIMER V5  
288 software (PREMIER Biosoft International, Palo Alto, CA). Standard PCR was carried out using  
289 Q5<sup>TM</sup> High-Fidelity DNA polymerase (NEB) with the cDNA as template, RNA as negative  
290 control and the genomic DNA of BBMN68 as positive control.

### 291 **Functional identification of target gene *bmrA* and *bmrB* by Heterologous Expression**

292 The *bmrA* gene and *bmrB* gene encoding half ABC-transporter were amplified from *B. longum*  
293 BBMN68 using primers *bmrA*-F/*bmrA*-R and *bmrB*-F/*bmrB*-R, respectively (Table S2). Then the  
294 *bmrA* and *bmrB* gene was co-amplified using *bmrA*-F and *bmrB*-R. All PCR amplicons digested  
295 by *Xba*I and *Hind*III were inserted into pNZ8147. The ligation mixture was transformed into *L.*  
296 *lactis* NZ9000, resulting in recombinant strain *L. lactis* BmrA, *L. lactis* BmrB and *L. lactis*  
297 BmrAB, respectively. Meanwhile, the strain *L. lactis* NZ9000 with the empty vector pNZ8147  
298 was used as control. The recombinant strains were grown in GM17 medium supplemented with  
299 0.05%, 0.10% or 0.15% wt/vol ox-bile to determine the survival rate. All results were obtained  
300 by at least three independent experiments with each performed in triplicate.

### 301 **Statistical analysis**



302 Data were analyzed using GraphPad Prism 6 software for Windows (GraphPad Software, Inc., La  
303 Jolla, CA, USA). When two groups were compared, an unpaired student t test with Welch's  
304 correction to calculate P values. When three groups or more were compared, one-way ANOVA  
305 was used followed by an appropriate post-hoc test.

### 306 **Authors and Contributors**

307 Q.X., H.A., Z.Z. and Y.H. designed research; Q.X. and H.A. performed research; Y.Y., J.Y., and  
308 G.W. contributed new reagents or analytic tools; Q.X., Z.Z. and Y.H. analyzed the data and  
309 wrote the paper. All authors read and approved the final manuscript.

### 310 **Conflict of Interest Statement**

311 The authors declare that the research was conducted in the absence of any commercial or  
312 financial relationships that could be construed as a potential conflict of interest.

### 313 **Acknowledgements**

314 This work was supported by the National Natural Sciences Foundation of China (contract  
315 No.21676294) and the International Postdoctoral Exchange Fellowship Program [No.  
316 20150027]. We thank Professor Willem M. de Vos (Wageningen University) for the gift of *L.*  
317 *lactis* NZ9000 and plasmid pNZ8148. We also thank Dr. Kuanqing Liu (UT Southwestern  
318 Medical Center) for helpful comments.

### 319 **References**

320 1. Harmsen HJ1, Wildeboer-Veloo AC, Raangs GC, Wagendorp AA, Klijn N, Bindels

- 321 JG, Welling GW. 2000. Analysis of intestinal flora development in breast-fed and  
322 formula-fed infants by using molecular identification and detection methods.  
323 J Pediatr Gastroenterol Nutr 30: 61–67.
- 324 2. Hofmann AF, and Eckmann L. 2006. How bile acids confer gut mucosal protection against  
325 bacteria. Proc Natl Acad Sci U S A 103: 4333-4334.
- 326 3. Tannock GW. 1999. A fresh look at the intestinal microflora. In: Tannock GW, editor.  
327 Probiotics. a critical review. Wymondham, (UK): Horizon Scientific Press.
- 328 4. Noriega L, Gueimonde M, Sánchez B, Margolles A, de los Reyes-Gavilán CG. 2004. Effect  
329 of the adaptation to high bile salts concentrations on glycosidic activity, survival at low pH  
330 and cross-resistance to bile salts in *Bifidobacterium*. Int J Food Microbiol 94: 79-86. doi:  
331 10.1016/j.ijfoodmicro. 2004.01.003
- 332 5. Sánchez B, Champomier-Vergès MC, Stuer-Lauridsen B, Ruas-Madiedo P, Anglade  
333 P, Baraige F, de los Reyes-Gavilán CG, Johansen E, Zagorec M, Margolles A. 2007.  
334 Adaptation and response of *Bifidobacterium animalis* subsp. *lactis* to bile: a proteomic and  
335 physiological approach. Appl Environ Microbiol 73: 6757-6767. doi: 10.1128/  
336 aem.00637-07.
- 337 6. Bernstein C, Bernstein H, Payne CM, Beard SE, Schneider J. 1999. Bile salt activation of  
338 stress response promoters in *Escherichia coli*. Curr Microbiol 39: 68-72.
- 339 7. Grill JP, Perrin S, and Schneider F. 2000. Bile salt toxicity to some bifidobacteria strains:

- 340 role of conjugated bile salt hydrolase and pH. *Can J Microbiol* 46: 878-884.
- 341 8. Price CE, Reid SJ, Driessen AJ, Abratt VR. 2006. The *Bifidobacterium longum* NCIMB  
342 702259T ctr gene codes for a novel cholate transporter. *Appl Environ Microbiol* 72: 923-926.
- 343 9. Gueimonde M, Garrigues C, van Sinderen D, de los Reyes-Gavilan CG, Margolles A. 2009.  
344 Bile-inducible efflux transporter from *Bifidobacterium longum* NCC2705, conferring bile  
345 resistance. *Appl Environ Microbiol* 75: 3153-3160.
- 346 10. Margolles A, Florez AB, Moreno JA, van Sinderen D, de los Reyes-Gavilan CG. 2006. Two  
347 membrane proteins from *Bifidobacterium breve* UCC2003 constitute an ABC-type multidrug  
348 transporter. *Microbiology* 152: 3497-3505. doi: 10.1099/mic.0.29097-0
- 349 11. Ruiz L, Sánchez B, Ruas-Madiedo P, de los Reyes-Gavilán CG, Margolles A. 2007. Cell  
350 envelope changes in *Bifidobacterium animalis* ssp. *lactis* as a response to bile.  
351 *FEMS Microbiol Lett* 274: 316-322.
- 352 12. Ruiz L, Coute Y, Sanchez B, de los Reyes-Gavilan CG, Sanchez JC, Margolles A. 2009. The  
353 cell-envelope proteome of *Bifidobacterium longum* in an *in vitro* bile environment.  
354 *Microbiology* 155: 957-967. doi: 10.1099/mic.0.024273-0
- 355 13. Liu Y, An H, Zhang J, Zhou H, Ren F, Hao Y. 2014. Functional role of *tlyCI* encoding a  
356 hemolysin-like protein from *Bifidobacterium longum* BBMN68 in bile tolerance.  
357 *FEMS Microbiol Lett* 360: 167-173. doi: 10.1111/1574-69 68.12601.
- 358 14. An H, Douillard FP, Wang G, Zhai Z, Yang J, Song S, Cui J, Ren F, Luo Y, Zhang B, Hao

- 359 Y. (2014). Integrated transcriptomic and proteomic analysis of the bile stress response in a  
360 centenarian-originated probiotic *Bifidobacterium longum* BBMN68. Mol Cell Proteomics 13:  
361 2558-2572. doi: 10.1074/mcp.M114. 039156
- 362 15. Yang H, Liu A, Zhang M, Ibrahim SA, Pang Z, Leng X, Ren F. 2009. Oral administration of  
363 live *Bifidobacterium* substrains isolated from centenarians enhances intestinal function in  
364 mice. Curr Microbiol 59: 439-445. doi: 10.1007/s00284-009-9457-0
- 365 16. Yang J, Zhang H, Jiang L, Guo H, Luo, X, Ren F. 2015. *Bifidobacterium longum*  
366 BBMN68-specific modulated dendritic cells alleviate allergic responses to bovine  
367 beta-lactoglobulin in mice. J Appl Environ Microbiol 119: 1127-1137. doi:  
368 10.1111/jam.12923
- 369 17. Wilkinson SP, Grove A. 2006. Ligand-responsive transcriptional regulation by members of  
370 the MarR family of winged helix proteins. Curr Issues Mol Biol 8: 51-62.
- 371 18. Wagner A, Segler L, Kleinstaub S, Sawers G, Smidt H, Lechner U. 2013. Regulation of  
372 reductive dehalogenase gene transcription in *Dehalococcoides mccartyi*.  
373 Philos Trans R Soc Lond B Biol Sci 368, 20120317. doi: 10.1098/rstb.2012.0317
- 374 19. Martin RG, Rosner JL. 1995. Binding of purified multiple antibiotic- resistance repressor  
375 protein (MarR) to mar operator sequences. Proc Natl Acad Sci U S A 92: 5456-5460.
- 376 20. Lomovskaya O, Lewis K, Matin A. 1995. EmrR is a negative regulator of the *Escherichia*  
377 *coli* multidrug resistance pump EmrAB. J Bacteriol 177: 2328-2334.

- 378 21. Schielke S, Huebner C, Spatz C, Nägele V, Ackermann N, Frosch M, Kurzai  
379 O Schubert-Unkmeir A. 2009. Expression of the meningococcal adhesin NadA is controlled  
380 by a transcriptional regulator of the MarR family. *Mol Microbiol* 72: 1054–1067.
- 381 22. Perera IC, Grove A. 2010. Molecular mechanisms of ligand-mediated attenuation of DNA  
382 binding by MarR family transcriptional regulators. *J Mol Cell Biol* 2: 243–254.
- 383 23. Alekshun MN, Levy SB, Mealy TR, Seaton BA, Head JF. 2001. The crystal structure of  
384 MarR, a regulator of multiple antibiotic resistance, at 2.3 Å resolution. *Nat Struct Biol* 8:  
385 710-714. doi: 10.1038/90429
- 386 24. Sulavik MC, Gambino LF, Miller PF. 1995. The MarR repressor of the multiple antibiotic  
387 resistance (*mar*) operon in *Escherichia coli*: prototypic member of a family of bacterial  
388 regulatory proteins involved in sensing phenolic compounds. *Mol Med* 1: 436-446.
- 389 25. Alekshun MN, Kim YS, Levy SB. 2000. Mutational analysis of MarR, the negative regulator  
390 of *marRAB* expression in *Escherichia coli*, suggests the presence of two regions required for  
391 DNA binding. *Mol Microbiol* 35: 1394-1404.
- 392 26. Hong M, Fuangthong M, Helmann JD, Brennan RG. 2005. Structure of an OhrR-*ohrA*  
393 operator complex reveals the DNA binding mechanism of the MarR family. *Mol Cell* 20:  
394 131-141. doi: 10.1016/j.molcel.2005.09.013
- 395 27. Reese MG. 2001. Application of a time-delay neural network to promoter annotation in the  
396 *Drosophila melanogaster* genome. *Comput Chem* 26: 51–56.

- 397 28. Solovyev V, Salamov A. 2011. Automatic annotation of microbial genomes and  
398 metagenomic sequences. *Metagenomics and its applications in agriculture, biomedicine and*  
399 *environmental studies*, 61–78.
- 400 29. Deochand DK, Grove A. 2017. MarR family transcription factors: dynamic variations on a  
401 common scaffold. *Crit Rev Biochem Mol Biol* 52: 595-613. doi: 10.1080/10409238.2017.  
402 1344612.
- 403 30. Grkovic S, Brown MH, Skurray RA. 2002. Regulation of bacterial drug export systems.  
404 *Microbiol Mol Biol Rev* 66: 671– 701.
- 405 31. Prouty AM, Brodsky IE, Falkow S, Gunn, JS. 2004. Bile-salt-mediated induction of  
406 antimicrobial and bile resistance in *Salmonella typhimurium*. *Microbiology* 150: 775-783.
- 407 32. Zaidi AH, Bakkes PJ, Lubelski J, Agustiandari H, Kuipers OP, Driessen AJ. 2008. The  
408 ABC-type multidrug resistance transporter LmrCD is responsible for an extrusion-based  
409 mechanism of bile acid resistance in *Lactococcus lactis*. *J Bacteriol* 190: 7357-66. doi:  
410 10.1128/JB.00485-08.
- 411 33. Michaux C, Martini C, Hanin A, Auffray Y, Hartke A, Giard JC. 2011. SlyA regulator is  
412 involved in bile salts stress response of *Enterococcus faecalis*. *FEMS Microbiol Lett* 324:  
413 142-6. doi: 10.1111/j.1574-6968.2011.02390.x.
- 414 34. Schneider E, Hunke S. 1998. ATP-binding-cassette (ABC) transport systems: functional and  
415 structural aspects of the ATP-hydrolyzing subunits/domains. *FEMS Microbiol Rev* 22: 1-20.

- 416 35. Walker JE, Saraste M, Runswick MJ, Gay NJ. 1982. Distantly related sequences in the  
417 alpha-and beta-subunits of ATP synthase, myosin, kinases and other ATP-requiring enzymes  
418 and a common nucleotide binding fold. EMBO J 1: 945-951.
- 419 36. van Veen HW, Margolles A, Muller M, Higgins CF, Konings WN. 2000. The homodimeric  
420 ATP-binding cassette transporter LmrA mediates multidrug transport by an alternating  
421 two-site (twocylinder engine) mechanism. EMBO J 19, 2503–2514.
- 422 37. Chang G, Roth CB. 2001. Structure of MsbA from *E. coli*: a homolog of the multidrug  
423 resistance ATP binding cassette (ABC) transporters. Science 293: 1793-1800.
- 424 38. Lubelski J, Mazurkiewicz P, van Merkerk R, Konings WN, Driessen AJ. 2004. *ydaG* and  
425 *ydbA* of *Lactococcus lactis* encode a heterodimeric ATP- binding cassette-type multidrug  
426 transporter. J Biol Chem 279: 34449–34455.
- 427 39. de Ruyter PG, Kuipers OP, de Vos WM. 1996. Controlled gene expression systems for  
428 *Lactococcus lactis* with the food-grade inducer nisin. Appl Environ Microbiol 62: 3662–  
429 3667.

### 430 **Figure legends**

431 **Figure 1** Heterologous expression of BmrR with nisin induction detected by SDS-PAGE and the  
432 survival of *L. lactis* BmrR and *L. lactis* NZCK after ox-bile challenge. (A) Soluble extracts were  
433 analyzed on 12% denaturing SDS-PAGE. Lane M, Dual color pre-stained broad molecular  
434 weight protein marker (10–180 kDa). Lane 1, *L. lactis* NZCK without nisin induction; lane 2, *L.*

435 *lactis* BmrR without nisin induction; lane3, *L. lactis* NZCK with nisin ( $10 \text{ ng} \cdot \text{ml}^{-1}$ ) induction;  
436 lane 4, *L. lactis* BmrR with nisin ( $10 \text{ ng} \cdot \text{ml}^{-1}$ ) induction. Red arrow indicates the overexpressed  
437 BmrR. (B) Survival rate is calculated as the ratio of the number of colonies obtained on GM17  
438 plates after and before ox-bile treatment. Data are reported as mean $\pm$ SD from at least three  
439 independent experiments and analyzed by an unpaired, two-tailed Student t-test. \*\*\*\*,  $P < 0.0001$ .

440 **Figure 2** Multiple sequence alignment of BmrR with other MarR family regulators was  
441 generated with ClustalX and visualized in CLC Sequence Viewer 7.8.1. Numbering is according  
442 to the entire alignment. The proteins used for the alignment were from the following organisms:  
443 SlyA, *Salmonella enterica* sv. Typhimurium; MarR, *E. coli*; MexR, *Pseudomonas aeruginosa*;  
444 BmoR, *Bacteroides fragilis*; PecS, *Dickeya dadantii*. The prediction of BmrR secondary  
445 structure was based on Psipred and NetSurfP results and structures are illustrated with boxes  
446 ( $\alpha$ -helices), arrows ( $\beta$ -sheets) and lines (coils). The wing region (W) is indicated by white box.

447 **Figure 3** *In silico* analysis and RT-PCR assays to verify the co-transcription of *bmrR* to *bmrB*.  
448 (A) Linear map of *bmrR*, *bmrA* and *bmrB* with the genomic DNA flanking these genes in  
449 BBMN68. (B) Sequence analysis of the promoter region upstream *bmrR* gene. Putative  $-35$ ,  $-10$   
450 sequence and ribosome-binding site (RBS) are enclosed in the box. The putative binding site is  
451 shown in italics. (C) “gDNA” means the genomic DNA of wide-type BBMN68; “+” and “-”  
452 indicated the cDNA and RNA used as the template for PCR amplification. “M” means the DNA  
453 marker.



454 **Figure 4** SDS-PAGE analysis of the purified BmrRHis and specific binding of BmrRHis to its  
455 own promoter. (A) Lane 1 and 2, *L. lactis* NZCK and *L. lactis* BmrRHis with  $10 \text{ ng} \cdot \text{ml}^{-1}$  nisin  
456 induction; Lane 3, protein sample from NZCK after purification; Lane 4, purified recombinant  
457 BmrRHis from *L. lactis* BmrRHis. (B) DNA probes containing an intact palindromic sequence  
458 in the BmrR binding site or mutated sequence. (C) Lane 1, 20 fmol labelled probes alone. Lane 2  
459 to lane 4, 20 fmol probes and 10, 20 and  $30 \text{ ng} \cdot \mu\text{l}^{-1}$  BmrRHis, respectively. (D) Lane 1, 20 fmol  
460 labelled probes alone. Lane 2 to lane 4,  $10 \text{ ng} \cdot \mu\text{l}^{-1}$  BmrRHis with 20 fmol probes, 20 fmol probe  
461 up<sup>-</sup> and probe down<sup>-</sup>, respectively.

462 **Figure 5** The heterologous expression of gene *bmrA*, *bmrB* and *bmrAB* in *L. lactis* affects the  
463 survival of host strain after bile stress. Survival rate is calculated as the ratio of the number of  
464 colonies obtained on GM17 plates after and before ox-bile treatment. Data are reported as  
465 mean $\pm$ SD from at least three independent experiments and analyzed by an unpaired, two-tailed  
466 Student t-test. Bars with different letters are statistically significant ( $P < 0.05$ ).

467 **Figure 6** Effect of ox-bile on the DNA binding activity of BmrR. EMSA was performed with 20  
468 fmol probe and  $10 \text{ ng} \cdot \mu\text{l}^{-1}$  purified BmrRHis in the presence of 0.05%, 0.10% and 0.15% wt/vol  
469 ox-bile, respectively.

470 **Figure 7** Illustration of the BmrR regulation mechanism. (A) Under the normal growth condition,  
471 the active form of BmrR binds to the bmr box and represses transcription of BmrRAB operon. (B)

472 In presence of ox-bile, the DNA binding activity of BmrR is disrupted by ox-bile. This  
473 modification will result in the transcription of BmrAB ABC-transporters to pump out ox-bile.

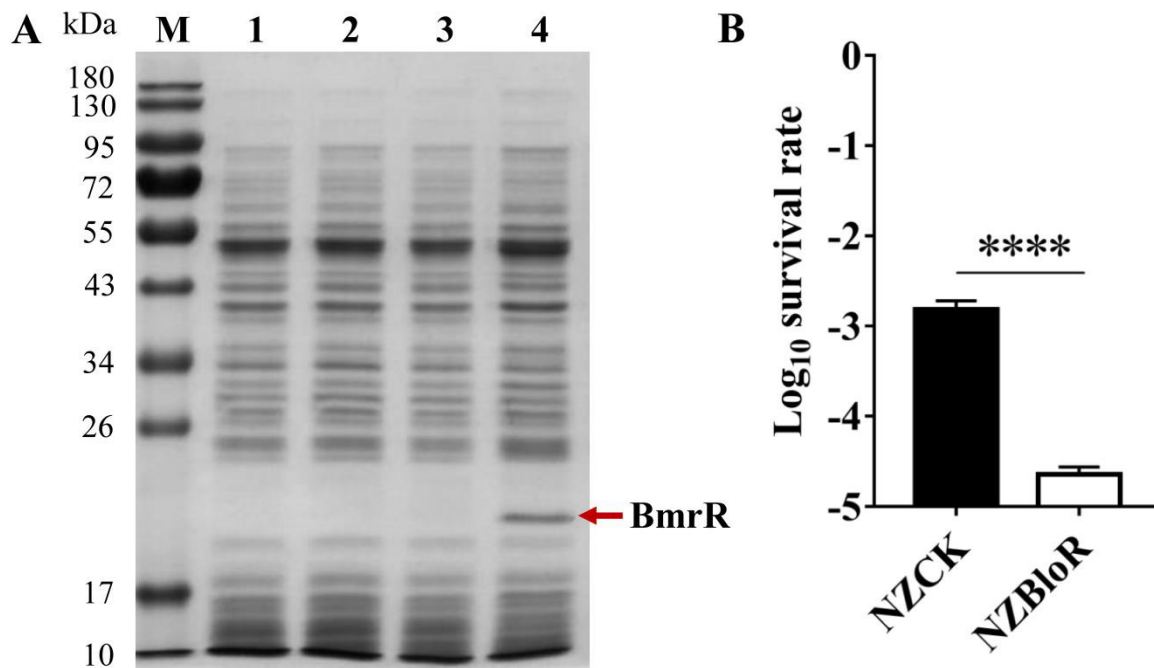

**Figure 1** Heterologous expression of BmrR with nisin induction detected by SDS-PAGE and the survival of *L. lactis* BmrR and *L. lactis* NZCK after ox-bile challenge. (A) Soluble extracts were analyzed on 12% denaturing SDS-PAGE. Lane M, Dual color pre-stained broad molecular weight protein marker (10–180 kDa). Lane 1, *L. lactis* NZCK without nisin induction; lane 2, *L. lactis* BmrR without nisin induction; lane 3, *L. lactis* NZCK with nisin (10 ng · ml<sup>-1</sup>) induction; lane 4, *L. lactis* BmrR with nisin (10 ng · ml<sup>-1</sup>) induction. Red arrow indicates the overexpressed BmrR. (B) Survival rate is calculated as the ratio of the number of colonies obtained on GM17 plates after and before ox-bile treatment. Data are reported as mean±SD from at least three independent experiments and analyzed by an unpaired, two-tailed Student t-test. \*\*\*\*\*,  $P < 0.0001$ .

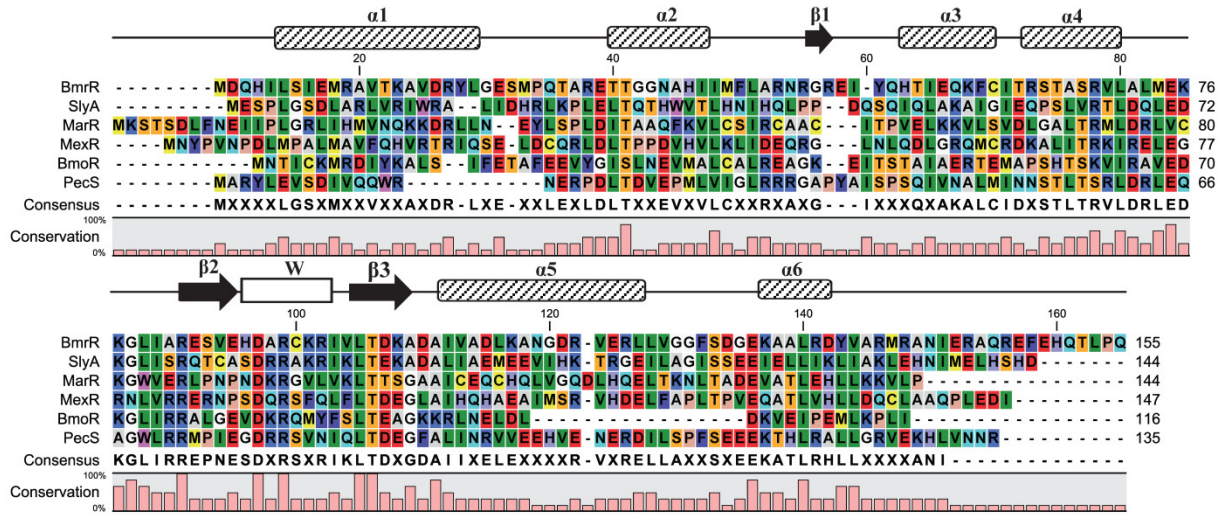

**Figure 2** Multiple sequence alignment of BmrR with other MarR family regulators was generated with ClustalX and visualized in CLC Sequence Viewer 7.8.1. Numbering is according to the entire alignment. The proteins used for the alignment were from the following organisms: SlyA, *Salmonella enterica* sv. Typhimurium; MarR, *E. coli*; MexR, *Pseudomonas aeruginosa*; BmoR, *Bacteroides fragilis*; PecS, *Dickeya dadantii*. The prediction of BmrR secondary structure was based on Psipred and NetSurfP results and structures are illustrated with boxes ( $\alpha$ -helices), arrows ( $\beta$ -sheets) and lines (coils). The wing region (W) is indicated by white box.

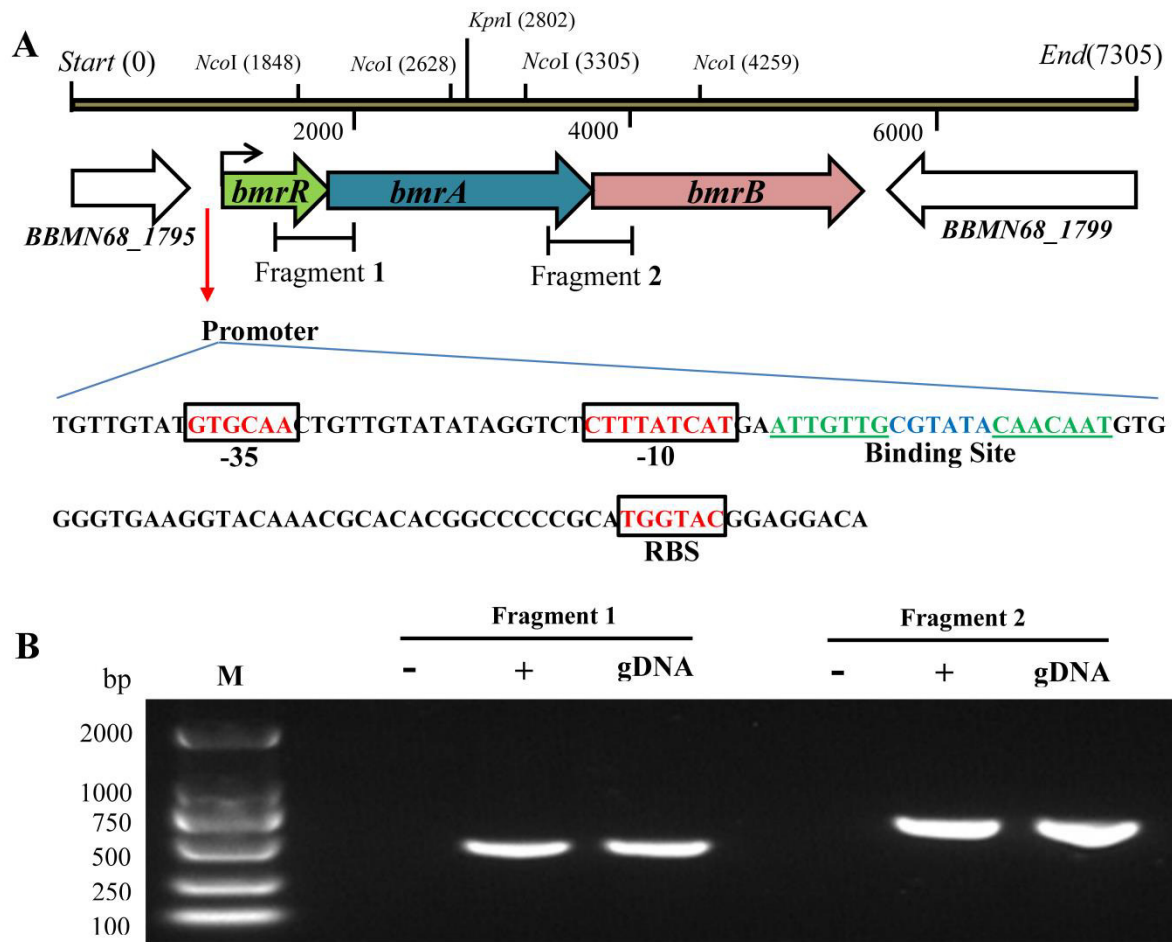

**Figure 3** *In silico* analysis and RT-PCR assays to verify the co-transcription of *bmrR* to *bmrB*.

(A) Linear map of *bmrR*, *bmrA* and *bmrB* with the genomic DNA flanking these genes in BBMN68. (B) Sequence analysis of the promoter region upstream *bmrR* gene. Putative -35, -10 sequence and ribosome-binding site (RBS) are enclosed in the box. The putative binding site is shown in italics. (C) “gDNA” means the genomic DNA of wide-type BBMN68; “+” and “-” indicated the cDNA and RNA used as the template for PCR amplification. “M” means the DNA marker.

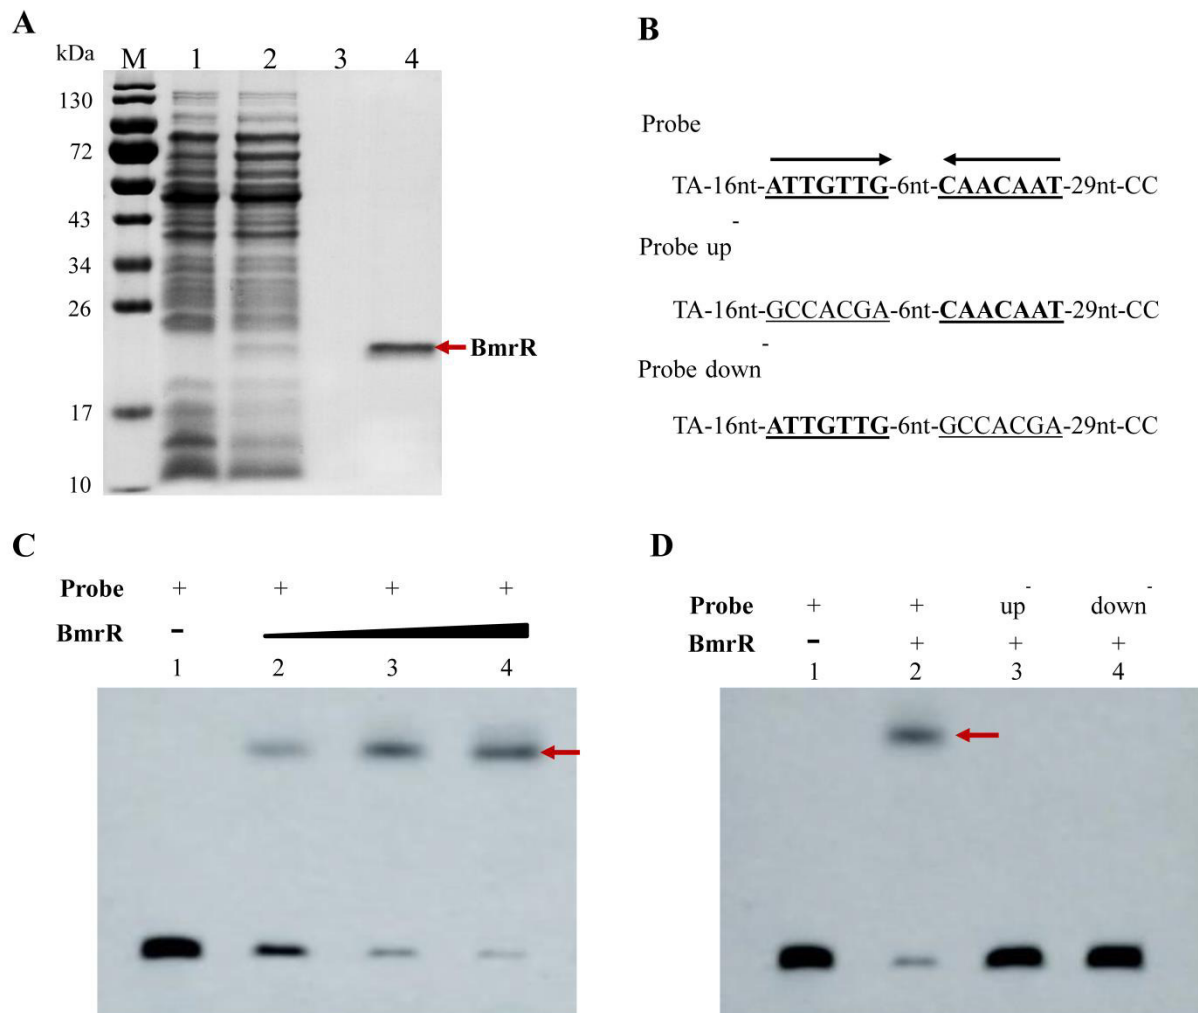

**Figure 4** SDS-PAGE analysis of the purified BmrRHis and specific binding of BmrRHis to its own promoter. (A) Lane 1 and 2, *L. lactis* NZCK and *L. lactis* BmrRHis with 10 ng · ml<sup>-1</sup> nisin induction; Lane 3, protein sample from NZCK after purification; Lane 4, purified recombinant BmrRHis from *L. lactis* BmrRHis. (B) DNA probes containing an intact palindromic sequence in the BmrR binding site or mutated sequence. (C) Lane 1, 20 fmol labelled probes alone. Lane 2 to lane 4, 20 fmol probes and 10, 20 and 30 ng · μl<sup>-1</sup> BmrRHis, respectively. (D) Lane 1, 20 fmol

labelled probes alone. Lane 2 to lane 4,  $10 \text{ ng} \cdot \mu\text{l}^{-1}$  BmrRHIs with 20 fmol probes, 20 fmol probe up<sup>-</sup> and probe down<sup>-</sup>, respectively.

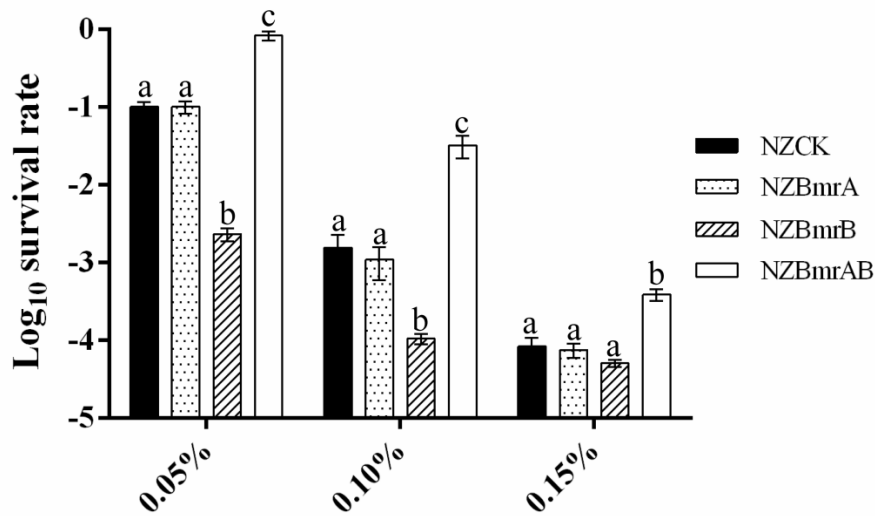

**Figure 5** The heterologous expression of gene *bmrA*, *bmrB* and *bmrAB* in *L. lactis* affects the survival of host strain after bile stress. Survival rate is calculated as the ratio of the number of colonies obtained on GM17 plates after and before ox-bile treatment. Data are reported as mean $\pm$ SD from at least three independent experiments and analyzed by an unpaired, two-tailed Student t-test. Bars with different letters are statistically significant ( $P < 0.05$ ).

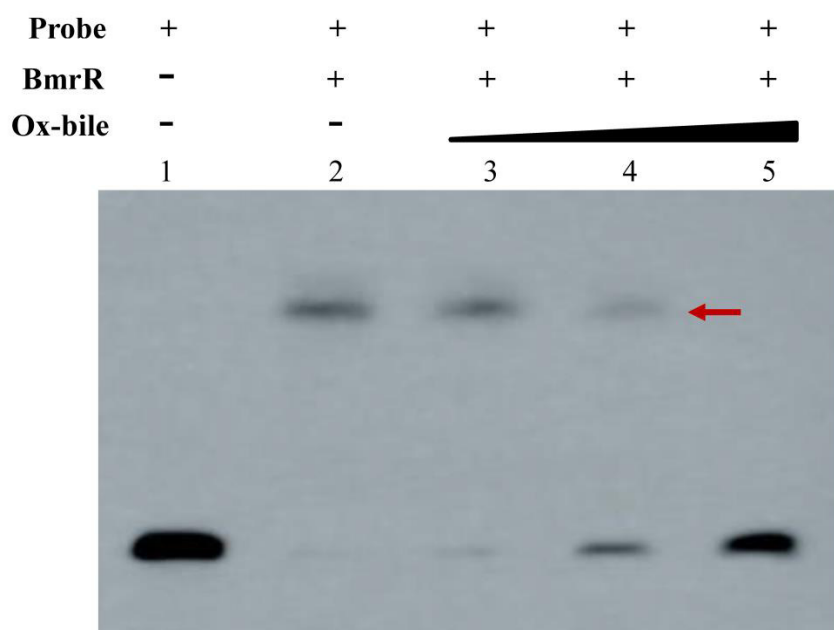

**Figure 6** Effect of ox-bile on the DNA binding activity of BmrR. EMSA was performed with 20 fmol probe and  $10 \text{ ng} \cdot \mu\text{l}^{-1}$  purified BmrRHis in the presence of 0.05%, 0.10% and 0.15% wt/vol ox-bile, respectively.



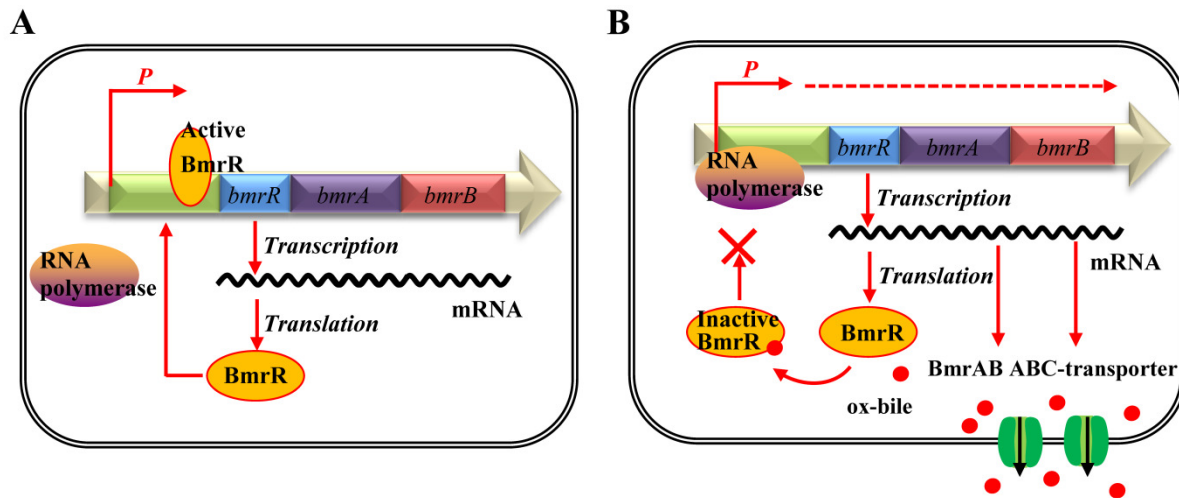

**Figure 7** Illustration of the BmrR regulation mechanism. (A) Under the normal growth condition, the active form of BmrR binds to the bmr box and represses transcription of BmrRAB operon. (B) In presence of ox-bile, the DNA binding activity of BmrR is disrupted by ox-bile. This modification will result in the transcription of BmrAB ABC-transporters to pump out ox-bile.
